# Supplementary material
Source: publisher site journal article supplement (https://www.dovepress.com/article/580024)

**Supplemental Fig. 1. Original western blots for Fig. 2A, proof of knock down (KD) of O-GlcNAcase (OGA) in the OGA-KD mice.** Liver extracts from the indicated genotypes and treatment groups (WT = wild type mice) were western blotted for OGA, global O-GlcNAc modification using antibody RL2, O-glycosyltransferase (OGT), and b-actin for normalization. Please note the original blot for O-GlcNAc in the second panel was cut to allow the multiple re-probings for the other proteins. MW ladder was from Thermo Fisher (Cat. No. 26630). Boxed areas indicate regions represented in Fig. 2A.


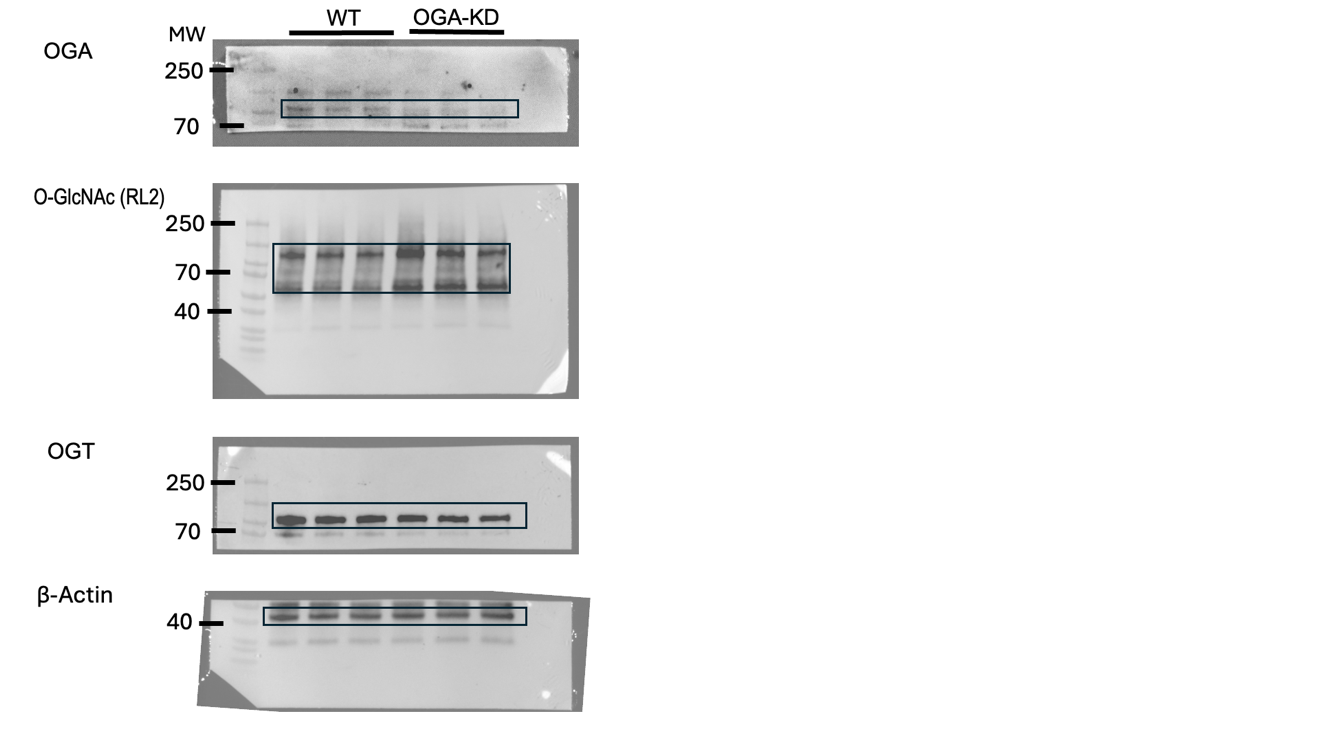


**Supplemental Fig. 2. Original uncut western blot for Fig. 5C, AMPK and pAMPK.** Liver extracts from the indicated genotypes and treatment groups (Plac. = placebo; Metf. = metformin) were western blotted for phosphorylated AMPK (pAMPK,) total AMPK, and b-actin for normalization. MW ladder was from Thermo Fisher (Cat. No. 26630). Boxed areas indicate regions represented in Fig. 5C.
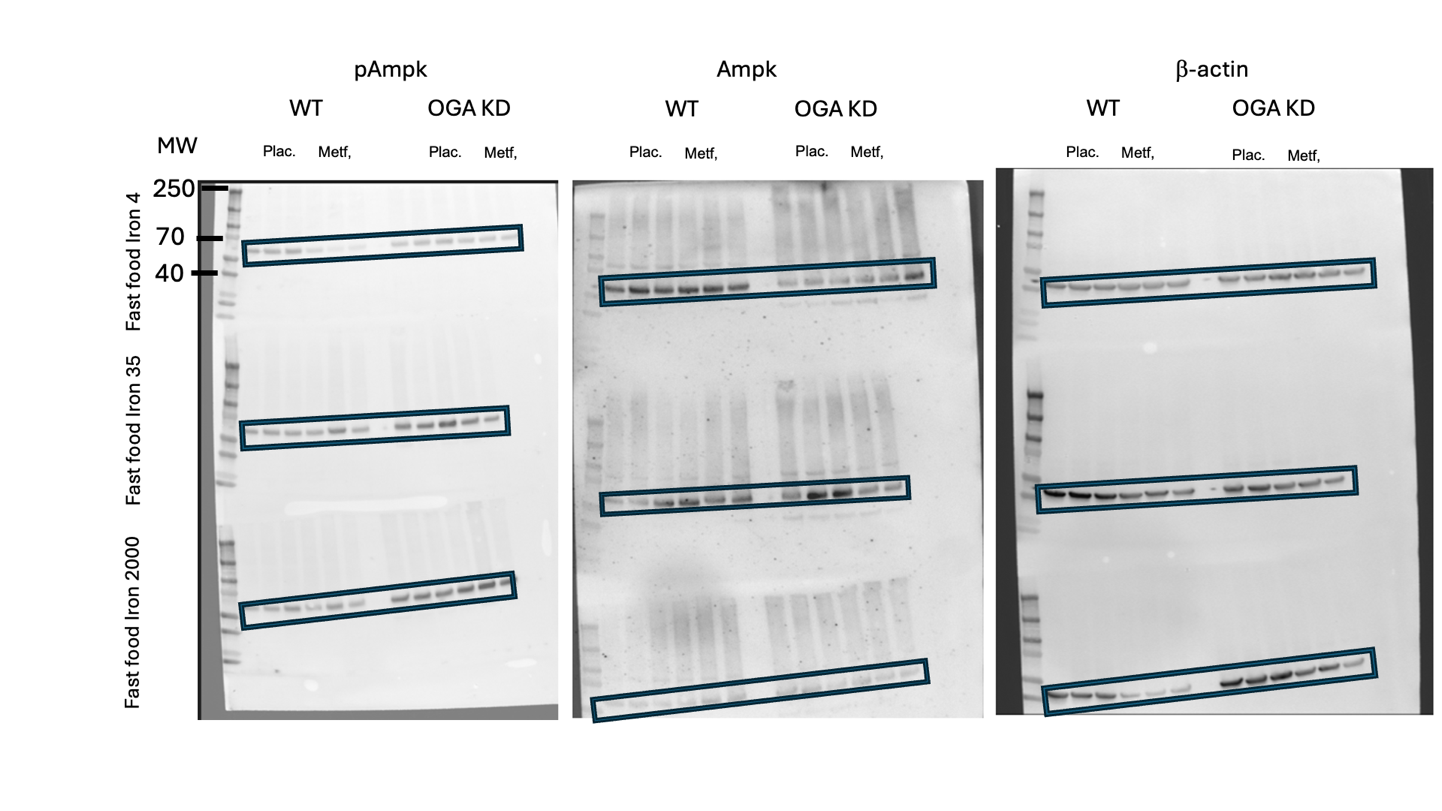


**Supplemental Fig. 3. Original uncut western blot for Fig. 5F, pACC and ACC.** Liver extracts from the indicated genotypes and treatment groups (Plac. = placebo; Metf. = metformin) were western blotted for phosphorylated acetyl-CoA carboxylase (pACC), total ACC, and b-actin for normalization. MW ladder was from Thermo Fisher (Cat. No. 26630). Boxed areas indicate regions represented in Fig. 5F.


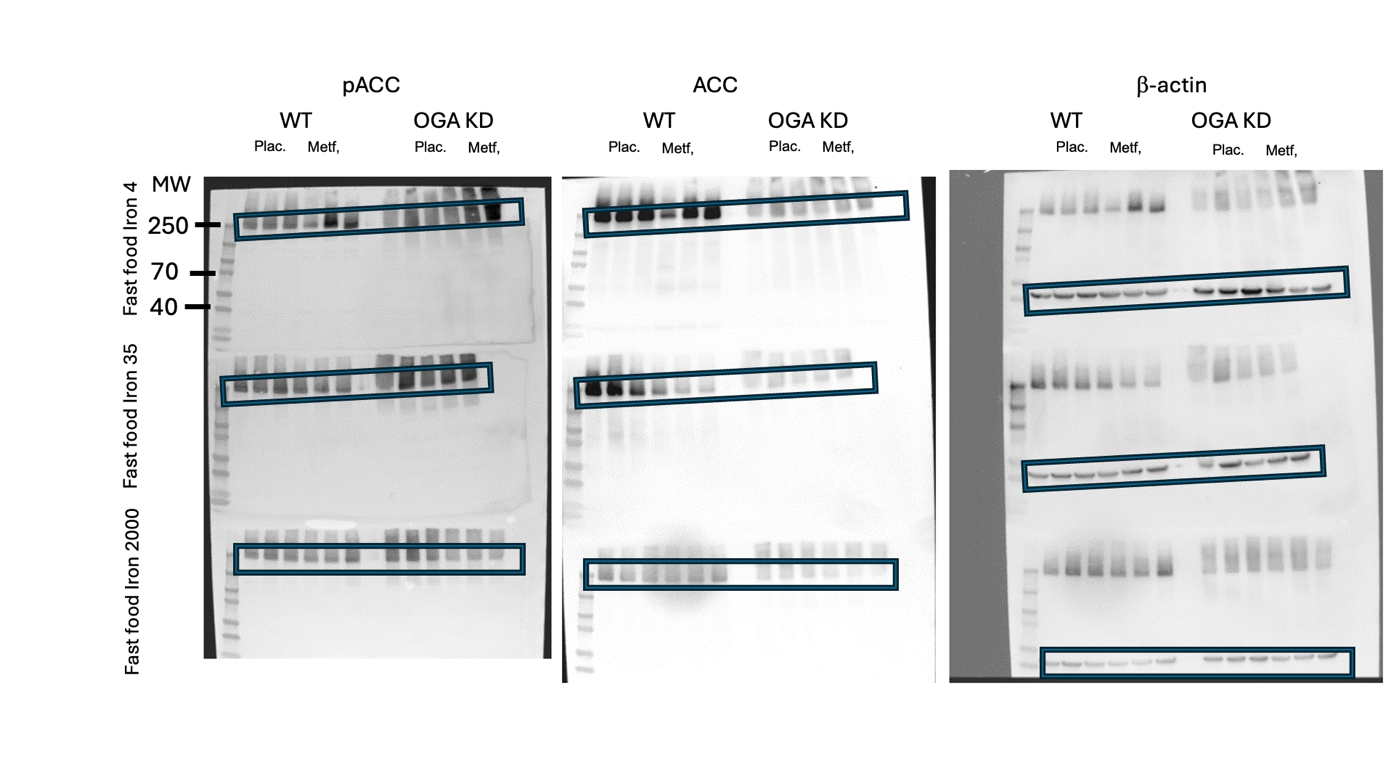


**Supplemental Fig. 4. Original uncut western blot for Fig. 6C, O-GlcNAc.** Liver extracts from the indicated genotypes and treatment groups (Plac. = placebo; Metf. = metformin) were western blotted for O-linked N-acetyl glucosamine (O-GlcNAc) using an antibody recognizing that modification on a broad range of proteins, and b-actin for normalization. MW ladder was from Thermo Fisher (Cat. No. 26630). Heavier boxed areas indicate regions represented in Fig. 6C as representative bands. Lighter boxed areas represent regions scanned for densitometry analysis in Fig. 6A and B.


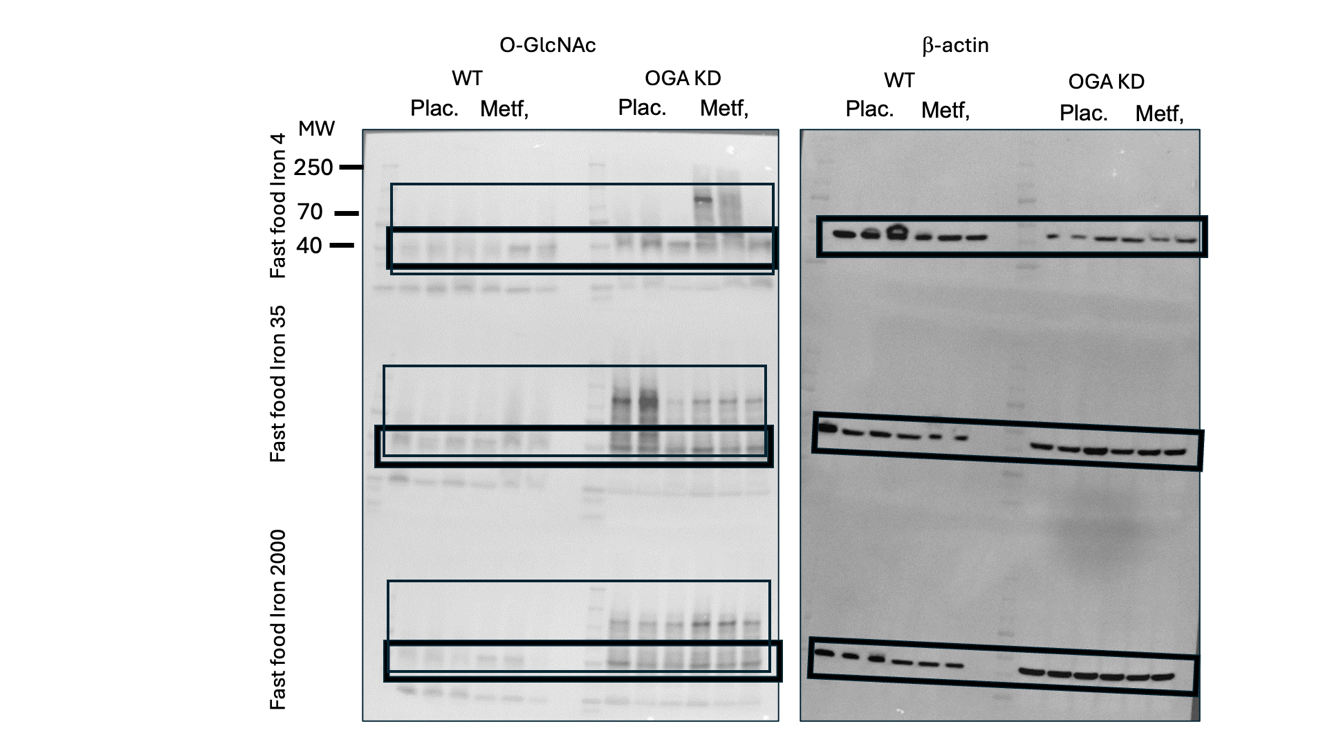

Supplement: Supplementary file 1 [file 580024%20Revised%20Supplementary%20Materials.docx]
